# Supplementary material for: Autism Spectrum Disorder and School Bullying: Who is the Victim? Who is the Perpetrator?
Source: Springer Nature journal article supplement (doi:10.1007/s10803-017-3285-z), 2017-09-21
Supplement: MOESM1 [file 15080050]

Supplementary Table 1 Bullying experiences measured by descriptive statistics of seven items in BASC-2 PRS in community children and children with DSM IV/DSM 5 ASD and ID (mean ± standard deviation, median and mode)

|  | DSM IV ASD with ID | DSM 5 ASD with ID | DSM IV ASD without ID | DSM 5 ASD without ID | Community Children |
| --- | --- | --- | --- | --- | --- |
| Victimization | 1.1 ± 0.9 a  (1.0/0.0) | 1.1 ± 0.8 a  (0.0/0.0) | 1.1 ± 0.9 a  (0.0/0.0) | 1.2 ± 0.9a  (0.0/0.0) | 0.6 ± 0.6b  (0.0/0.0) |
| Teasing others | 0.9 ± 1.1 a  (0.0/0.0) | 1.0 ± 0.9 a  (0.0/0.0) | 0.6 ± 0.7 a  (0.0/0.0) | 0.7 ± 0.8 a  (0.0/0.0) | 0.4 ± 0.5 b  (0.0/0.0) |
| Bullying others | 0.7 ± 1.0 a  (0.0/0.0) | 0.7 ± 0.7 a  (0.0/0.0) | 0.3 ± 0.6 a  (0.0/0.0) | 0.4 ± 0.7 a  (0.0/0.0) | 0.1 ± 0.4 b  (0.0/0.0) |
| Hitting others | 0.4 ± 0.5 a  (0.0/0.0) | 0.4 ± 0.5 a  (0.0/0.0) | 0.3 ± 0.5 a  (0.0/0.0) | 0.3 ± 0.5 a  (0.0/0.0) | 0.1 ± 0.3 b  (0.0/0.0) |
| Threatening to hurt others | 0.2 ± 0.4 a  (0.0/0.0) | 0.2 ± 0.5 a  (0.0/0.0) | 0.1 ± 0.4 a  (0.0/0.0) | 0.2 ± 0.4 a  (0.0/0.0) | 0.0 ± 0.2 b  (0.0/0.0) |
| Annoying others on purpose | 0.4 ± 0.6 a  (0.0/0.0) | 0.4 ± 0.7 a  (0.0/0.0) | 0.5 ± 0.8 a  (0.0/0.0) | 0.6 ± 0.8 a  (0.0/0.0) | 0.1 ± 0.4 b  (0.0/0.0) |
| Calling others names | 0.5 ± 0.5 a  (0.0/0.0) | 0.5 ± 0.6a  (0.0/0.0) | 0.6 ± 0.6 a  (0.0/0.0) | 0.7 ± 0.7 a  (0.0/0.0) | 0.4 ± 0.5 b  (0.0/0.0) |

a, b : All averages scores are significantly different between a and b (p<0.001).

(Median/Mode)

Supplementary Table 2 Correlation among demographic factors, bullying experience, and psychopathologies (Pearson correlation)

|  | **Age** | **Sex** | **Vic** | **Teas** | **Hit** | **Call** | **Hyper** | **Attn** | **Agg** | **Con** | **Anx** | **Dep** | **Som** | **Aty** | **With** |
| --- | --- | --- | --- | --- | --- | --- | --- | --- | --- | --- | --- | --- | --- | --- | --- |
| **Age** |  | 0.00 | -0.14** | -0.03** | -0.04** | 0.00 | -0.12** | 0.01 | -0.03** | -0.05** | 0.10** | -0.02* | 0.01 | 0.01 | 0.03** |
| **Sex** | 0.00 |  | 0.01 | -0.07** | -0.04** | 0.00 | -0.07** | -0.06** | -0.05** | -0.06** | 0.02* | 0.00 | 0.00 | -0.04** | 0.00 |
| **Vic** | -0.14** | 0.01 |  | 0.12** | 0.14** | 0.25** | 0.23** | 0.13** | 0.31** | 0.23** | 0.30** | 0.54** | 0.27** | 0.27** | 0.20** |
| **Teas** | -0.03** | -0.07** | 0.12** |  | 0.35** | 0.23** | 0.43** | 0.28** | 0.62** | 0.45** | 0.15** | 0.29** | 0.21** | 0.30** | 0.28** |
| **Hit** | -0.04** | -0.04** | 0.14** | 0.35** |  | 0.19** | 0.36** | 0.21** | 0.53** | 0.38** | 0.11** | 0.25** | 0.18** | 0.27** | 0.10** |
| **Call** | 0.00 | 0.00 | 0.25** | 0.23** | 0.19** |  | 0.30** | 0.14** | 0.58** | 0.32** | 0.23** | 0.34** | 0.26** | 0.27** | 0.17** |
| **Hyper** | -0.12** | -0.07** | 0.23** | 0.43** | 0.36** | 0.30** |  | 0.51** | 0.65** | 0.66** | 0.27** | 0.51** | 0.36** | 0.60** | 0.16** |
| **Att** | 0.01 | -0.06** | 0.13** | 0.28** | 0.21** | 0.14** | 0.51** |  | 0.36** | 0.48** | 0.03* | 0.32** | 0.18** | 0.42** | 0.28** |
| **Agg** | -0.03** | -0.05** | 0.31** | 0.62** | 0.53** | 0.58** | 0.65** | 0.36** |  | 0.65** | 0.34** | 0.59** | 0.42** | 0.55** | 0.28** |
| **Con** | -0.05** | -0.06** | 0.23** | 0.45** | 0.38** | 0.32** | 0.66** | 0.48** | 0.65** |  | 0.23** | 0.49** | 0.38** | 0.57** | 0.26** |
| **Anx** | 0.10** | 0.02* | 0.30** | 0.15** | 0.11** | 0.23** | 0.27** | 0.03* | 0.34** | 0.23** |  | 0.56** | 0.49** | 0.42** | 0.38** |
| **Dep** | -0.02* | 0.00 | 0.54** | 0.29** | 0.25** | 0.34** | 0.51** | 0.32** | 0.59** | 0.49** | 0.56** |  | 0.53** | 0.64** | 0.48** |
| **Som** | 0.01 | 0.00 | 0.27** | 0.21** | 0.18** | 0.26** | 0.36** | 0.18** | 0.42** | 0.38** | 0.49** | 0.53** |  | 0.48** | 0.33** |
| **Aty** | 0.01 | -0.04** | 0.27** | 0.30** | 0.27** | 0.27** | 0.60** | 0.42** | 0.55** | 0.57** | 0.42** | 0.64** | 0.48** |  | 0.46** |
| **With** | 0.03** | 0.00 | 0.20** | 0.28** | 0.10** | 0.17** | 0.16** | 0.28** | 0.28** | 0.26** | 0.38** | 0.48** | 0.33** | 0.46** |  |

Vic: Victimization; Teas: Teasing; Hit: Hitting; Call: Name calling; Hyper: Hyperactivity; Attn: Attention Problems; Agg: Aggression; Con: Conduct Problems; Anx: Anxiety; Dep: Depression; Som: Somatization; Aty: Atypicality;

With: Withdrawal;

**p<0.001, *p<0.05

Supplementary Table 3 Ordinal regression analyses for variables predicting different types of bullying experiences.

|  | Victimization | | Teasing | | Bullying | | Hitting | | Threatening | | Annoying | | Name Calling | |
| --- | --- | --- | --- | --- | --- | --- | --- | --- | --- | --- | --- | --- | --- | --- |
| **Control** | |  | |  | |  | |  | |  | |  | |  |
| Age | | **14.91 (2.33-18.85)**** | | **4.15 (1.55-5.01)*** | | 2.56 (0.74-3.07) | | **4.17 (1.83-6.20)*** | | 3.46 (0.54-5.04) | | **7.87 (2.94-9.17)*** | | **6.03 (1.97-9.59)*** |
| Sex | | 1.15 (0.14-1.47) | | **7.41 (1.38-9.62)*** | | **7.49 (2.44-12.24)*** | | 0.53 (0.07-0.84) | | **3.85 (1.52-6.00)*** | | 0.20 (0.06-0.39) | | **11.77 (2.42-18.88)**** |
| Hyperactivity | | 1.31 (0.07-1.48) | | **5.07 (1.24-.7.23)*** | | **12.09 (3.21-17.24)**** | | **3.88 (1.00-5.50)*** | | **13.04 (4.31-15.42)**** | | **8.49 (2.12-10.64)*** | | **15.29 (2.58-19.19)**** |
| Attention problems | | **6.65 (1.35-10.05)*** | | **16.84 (2.43-19.77)**** | | **13.44 (3.20-18.75)**** | | 2.22 (1.37-2.46) | | 2.27 (0.62-3.90) | | **14.07 (2.32-17.30)**** | | **16.40 (2.50-20.28)**** |
| Aggression | | 3.09 (0.42-5.38) | | **19.87 (5.67-26.20)**** | | **18.45 (5.79-26.48)**** | | **45.75 (9.29-69.26)**** | | **35.31 (9.44-45.51)**** | | **29.31 (4.89-35.50)**** | | **17.73 (5.22-21.73)**** |
| Conduct problems | | 3.78 (0.47-5.23) | | **17.09 (8.41-23.35)**** | | **19.34 (7.50-23.41)**** | | **20.39 (8.45-31.14)**** | | 2.80 (0.94-3.12) | | **5.73 (2.07-7.20)*** | | **6.39 (1.92-8.42)*** |
| Anxiety | | **4.67 (1.35-6.22)*** | | 1.51 (0.41-1.91) | | **8.40 (1.43-10.08 )*** | | 1.34 (0.28-1.70) | | **5.22 (2.09-6.12)*** | | **11.99 (2.32-18.82)**** | | **4.81 (1.26-6.37)*** |
| Depression | | **19.24 (4.23-24.41)**** | | **6.33 (1.96-9.58)*** | | **18.83 (5.11-20.62)**** | | **9.46 (2.88-10.35)*** | | 0.81 (0.02-0.91) | | **13.92 (2.93-17.44)**** | | **5.40 (1.31-9.36)*** |
| Somatization | | **8.38 (1.19-9.52)*** | | 1.67 (0.36-2.03) | | **8.15 (1.66-10.01)*** | | 0.53 (0.37-0.71) | | 1.85 (0.63-2.72) | | 0.41 (0.03-0.71) | | **5.27 (1.94-7.42)*** |
| Atypicality | | **14.36 (1.96-15.96)**** | | **8.67 (2.91-14.42)**** | | 0.60 (0.19-1.44) | | **6.06 (1.73-8.01)*** | | **5.22 (1.91-8.61)*** | | **11.29 (2.23-18.21)**** | | **8.24 (2.86-10.37)*** |
| Withdrawal | | **23.69 (4.34-27.18)**** | | **6.48 (2.32-9.04)*** | | **5.42 (1.40-7.43)*** | | 2.89 (0.83-3.03) | | 2.10 (0.91-2.61) | | 3.19 (0.92-4.36) | | 0.20 (0.01-0.61) |
| **ASD** | |  | |  | |  | |  | |  | |  | |  |
| Age | | 0.53 (0.19-0.65) | | 0.80 (0.19-1.15) | | 0.85 (0.27-1.37) | | **2.20 (1.31-3.19)*** | | 0.25 (0.05-0.42) | | 1.58 (0.73-1.92) | | 1.37 (0.67-.1.41) |
| Sex | | 1.31 (0.78-1.57) | | 1.38 (0.89-1.48) | | 0.20 (0.06-0.58) | | 0.02 (0.01-0.05) | | 0.69 (0.23-1.09) | | 0.81 (0.12-1.31) | | 0.36 (0.19-0.48) |
| Hyperactivity | | 2.63 (0.28-3.15) | | 0.87 (0.18-1.24) | | 1.61 (0.85-1.84) | | **3.80 (1.63-5.35)*** | | 0.13 (0.02-0.59) | | **4.51 (2.53-7.13)*** | | **5.18 (1.63-7.27)*** |
| Attention problems | | **6.83 (1.63-9.41)*** | | 1.43 (0.80-1.73) | | 0.63 (0.18-1.41) | | 0.13 (0.02-0.18) | | 0.17 (0.02-0.32) | | **2.39 (1.79-5.81)*** | | 0.99 (0.61-1.44) |
| Aggression | | **6.78 (1.58-8.48)*** | | **18.20 (2.45-20.85)**** | | **14.67 (3.03-19.35)**** | | **7.04 (1.31-9.32)*** | | **2.42 (1.24-3.59)*** | | **17.37 (2.81-19.76)**** | | **15.18 (2.03-20.35)**** |
| Conduct problems | | 0.31 (0.25-0.44) | | **2.38 (1.86-4.46)*** | | **9.51 (2.39-11.76)*** | | **7.19 (2.36-10.74)*** | | 1.56 (0.95-2.01) | | **2.79 (1.71-3.75)*** | | **2.90 (1.39-4.11)*** |
| Anxiety | | **4.04 (1.12-5.19)*** | | 0.22 (0.12-0.79) | | 0.44 (0.09-0.94) | | 0.60 (0.01-0.85) | | 0.88 (0.31-1.13) | | 0.18 (0.09-0.25) | | 0.52 (0.25-0.75) |
| Depression | | **11.56 (2.19-13.34)**** | | 0.90 (0.19-1.17) | | **9.51 (1.24-11.62)*** | | 0.07 (0.02-0.09) | | 0.86 (0.25-1.03) | | 0.81 (0.01-1.01) | | 0.63 (0.11-1.31) |
| Somatization | | 1.13 (0.65-1.31) | | 1.14 (0.32-1.47) | | **6.72 (1.75-8.04)*** | | 3.13 (0.54-5.28) | | 1.07 (0.39-1.24) | | **5.22 (1.16-7.41)*** | | 0.81 (0.09-1.13) |
| Atypicality | | **6.22 (1.25-7.31)*** | | 0.11(0.04-0.15) | | 1.33 (0.69-1.67) | | 1.96 (0.36-2.61) | | 0.92 (0.42-1.39) | | **3.45 (1.38-4.88)*** | | 0.63 (0.21-1.03) |
| Withdrawal | | 0.06 (0.01-0.08) | | 1.43 (0.80-1.53) | | 0.07 (0.01-0.10) | | 0.07 (0.02-0.09) | | 1.37 (0.89-1.45) | | **2.52 (1.31-4.01)*** | | 0.52 (0.25-1.01) |

Each column contains: Odds ratio/(confidence interval). *p<0.05, **p<0.001
